# Supplementary material
Source: PubMed Central journal article supplement (PMC7159286)
Supplement: mmc1.pdf [file mmc1.pdf]

# THE LANCET

## Supplementary appendix

This appendix formed part of the original submission and has been peer reviewed. We post it as supplied by the authors.

Supplement to: Chan J F-W, Yuan S, Kok K-H, et al. A familial cluster of pneumonia associated with the 2019 novel coronavirus indicating person-to-person transmission: a study of a family cluster. *Lancet* 2020; published online Jan 24. [http://dx.doi.org/10.1016/S0140-6736\(20\)30154-9](http://dx.doi.org/10.1016/S0140-6736(20)30154-9).

## **Supplementary Methods**

### **Whole genome sequencing**

#### **Specimen preparation**

To deplete host cells, nasopharyngeal and sputum specimens were centrifuged at  $16,000 \times g$  for 2 min, and supernatant was used for subsequent RNA extraction (1). An internal RNA control (*Escherichia coli* bacteriophage MS2 [ATCC® 15597B1]) was added to the supernatant. RNA was extracted from 140  $\mu$ L of supernatant or no-template control (viral transport medium) using QIAamp Viral RNA Mini Kit (Qiagen, Hilden, Germany) as we described previously (2). DNase treatment (TURBO DNA-free Kit, Invitrogen, Thermo Fisher Scientific, Waltham, MA, USA) was used in removing residual host DNA.

#### **Sequence-independent single-primer amplification (SISPA)**

SISPA was performed as described previously with modifications (1,3). Briefly, DNase-treated RNA was reverse transcribed to single strand cDNA using primer A (5'-GTTTCCCCTGGAGGATA-N9-3'). Second strand cDNA synthesis was performed using Klenow Fragment (3'→5' exo-) (New England BioLabs, Ipswich, Massachusetts). PCR using primer B (5'-GTTTCCCCTGGAGGATA-3') was used in generating the amplified cDNA libraries.

Nanopore sequencing library preparation was performed according to manufacturer's instructions for Ligation Sequencing Kit (SQK-LSK109, Oxford Nanopore Technologies). Briefly, amplified PCR products were purified by  $1 \times$  AMPure XP bead (Beckman Coulter, California, CA). Equal molar of each amplified PCR products were then subjected to DNA repair, end preparation, and native barcode ligation (EXP-NBD104, Oxford Nanopore Technologies).

Barcoded samples were pooled and were ligated to sequencing adaptor. Sequencing was performed with Oxford Nanopore MinION device using R9.4.1 flow cell for 12-48 hours.

### **Bioinformatics analysis**

After sequencing, Guppy v3.4.4 was used in converting the raw signal data into FASTQ format, demultiplexing, removal of nanopore and SISPA adaptor sequences. Only reads with a minimum Q score of 7 were included for subsequent analysis. The sequencing run was quality-checked using MinIONQC (4). Human reads were depleted by mapping to reference human genome hg38, and unmapped reads were extracted using SAMTools (5). BCFtools Mpileup was used in creating a variant file (6). BCFtools call (6), vcfutils.pl (5), and Seqtk seq (7) were used in generating the FASTA consensus sequence. Finally, the coverage data was obtained using SAMtools (5).

**Supplementary figure legends:**

*Figure S1.* Gel electrophoresis after reverse transcription-polymerase chain reaction using primers targeting RNA-dependent RNA polymerase of SARS-related coronaviruses.

*Figure S2.* Melting curve of SYBR green real-time polymerase chain reaction targeting Spike of the novel coronavirus showing a unique clean peak and a melting temperature of ~78 °C.

S1

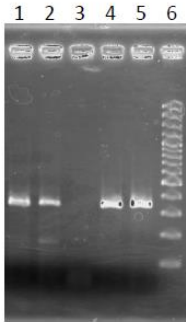

Lane 1: P2 NPS  
Lane 2: P1 NPS  
Lane 3: Negative control  
Lane 4: High positive control  
Lane 5: Low positive control  
Lane 6: GeneRuler 100 bp Plus DNA Ladder

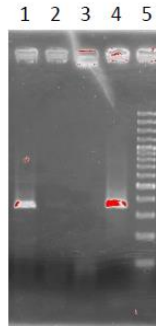

Lane 1: P4 NPS (1<sup>st</sup> sample)  
Lane 2: P4 NPS (2<sup>nd</sup> sample)  
Lane 3: Negative control  
Lane 4: Positive control  
Lane 5: GeneRuler 100 bp Plus DNA Ladder

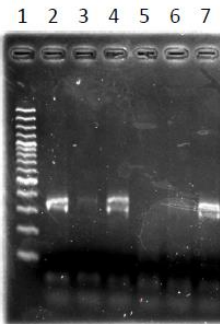

Lane 1: GeneRuler 100 bp Plus DNA Ladder  
Lane 2: P7 NPS  
Lane 3: P7 Throat swab  
Lane 4: P7 Sputum  
Lane 5: Negative control  
Lane 6: P4 NPS (3<sup>rd</sup> sample)  
Lane 7: P5 Sputum

Target size: 344 bp RdRp

S2

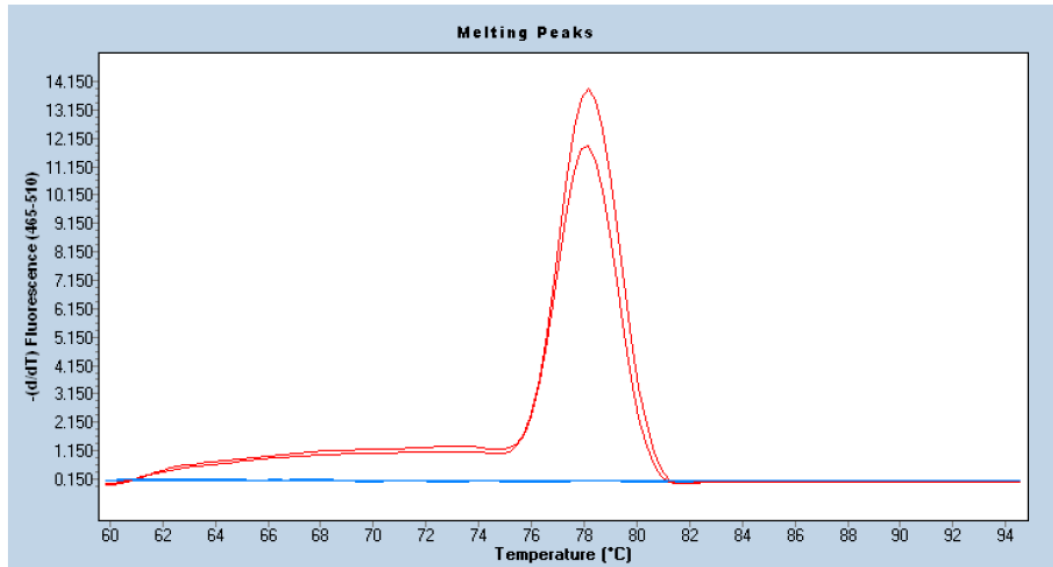

T<sub>m</sub> of P1 and P2: about 78°C

**Supplementary Table S1. Names and accession numbers of the coronavirus strains in the present study.**

|         | Name        | Accession number |          |              |
|---------|-------------|------------------|----------|--------------|
|         |             | RdRp             | Spike    | Whole genome |
| P1      |             |                  |          |              |
| NPS     | HKU-SZ-001  | MN938385         | MN938387 | -            |
| P2      |             |                  |          |              |
| NPS*    | HKU-SZ-002a | -                | -        | MN938384     |
| Serum   | HKU-SZ-002b | -                | MN938388 | -            |
| P4      |             |                  |          |              |
| NPS     | HKU-SZ-004  | MN938386         | MN938389 | -            |
| P5      |             |                  |          |              |
| TS      | HKU-SZ-005  | -                | MN938390 | -            |
| Sputum* | HKU-SZ-005b | -                | -        | MN975262     |
| P7      |             |                  |          |              |
| NPS     | HKU-SZ-007a | MN975263         | MN975266 | -            |
| TS      | HKU-SZ-007b | MN975264         | MN975267 | -            |
| Sputum  | HKU-SZ-007c | MN975265         | MN975268 | -            |

\* RdRp and Spike sequences can be inferred from whole genome sequence.

## References

- (1) Lewandowski K, Xu Y, Pullan ST, Lumley SF, Foster D, Sanderson N, et al. Metagenomic Nanopore Sequencing of Influenza Virus Direct from Clinical Respiratory Samples. *J Clin Microbiol* 2019;58
- (2) To KKW, Chan WM, Li KSM, Lam CSF, Chen Z, Tse H, et al. High prevalence of four novel astrovirus genotype species identified from rodents in China. *J Gen Virol* 2017;10.1099/jgv.0.000766
- (3) Greninger AL, Naccache SN, Federman S, Yu G, Mbala P, Bres V, et al. Rapid metagenomic identification of viral pathogens in clinical samples by real-time nanopore sequencing analysis. *Genome Med* 2015;7:99
- (4) Lanfear R, Schalamun M, Kainer D, Wang W, Schwessinger B. MinIONQC: fast and simple quality control for MinION sequencing data. *Bioinformatics* 2019;35:523-5
- (5) Li H, Handsaker B, Wysoker A, Fennell T, Ruan J, Homer N, et al. The Sequence Alignment/Map format and SAMtools. *Bioinformatics* 2009;25:2078-9
- (6) Narasimhan V, Danecek P, Scally A, Xue Y, Tyler-Smith C, Durbin R. BCFtools/RoH: a hidden Markov model approach for detecting autozygosity from next-generation sequencing data. *Bioinformatics* 2016;32:1749-51
- (7) GitHub. <https://github.com/lh3/seqtk> (accessed on Jan 10, 2020).
